# Supplementary material for: Assessing the format and content of journal published and non-journal published rapid review reports: A comparative study
Source: PubMed Central journal article supplement (PMC7449464; doi:10.1371/journal.pone.0238025), 2020-08-26
Supplement: pone.0238025.s009.pdf [file pone.0238025.s009.pdf]

**S7 Table 1. General Characteristics of Included Rapid Reviews (RRs)**

| Characteristics                                                                        | Journal<br>(n=52)    | Non-journal<br>(n=51) |
|----------------------------------------------------------------------------------------|----------------------|-----------------------|
| <i>List of authors provided, n (%)</i>                                                 | 52 (100)             | 37 (73)               |
| <i>Number of authors listed, mean (SD)</i>                                             | 5.5 (3.5)            | 3.9 (2.5)             |
| <i>Corresponding authors listed, n (%)</i>                                             | 46 (88)              | 3 (6)                 |
| Country of corresponding author or producer, n (%)                                     |                      |                       |
| United Kingdom                                                                         | 20 (38)              | 1 (2)                 |
| Canada                                                                                 | 12 (23)              | 30 (59)               |
| Australia                                                                              | 4 (8)                | 10 (20)               |
| United States                                                                          | 3 (6)                | 7 (14)                |
| Italy                                                                                  | 2 (4)                | 0                     |
| Belgium                                                                                | 2 (4)                | 0                     |
| Scotland                                                                               | 1 (2)                | 2 (4)                 |
| Denmark; Spain; China; Sweden; Saudi Arabia; Germany; Taiwan; Netherlands <sup>1</sup> | 1 (2)                | 0                     |
| Other                                                                                  | 0                    | 1 (2)                 |
| <i>RRs produced by a specific organization/institute/team, n (%)</i>                   | 7 (13)               | 51 (100)              |
| Unique organizations, n                                                                | 5                    | 25                    |
| <i>Academic affiliation, n (%)</i>                                                     |                      |                       |
| Yes <sup>2</sup>                                                                       | 50 (96)              | 17 (33)               |
| No                                                                                     | 1 (2)                | 31 (61)               |
| Unclear                                                                                | 1 (2)                | 3 (6)                 |
| <i>RR commissioned or requested, n (%)</i>                                             | 13 (25)              | 27 (53)               |
| Country, n                                                                             |                      |                       |
| United Kingdom                                                                         | 7                    | 1                     |
| Canada                                                                                 | 3                    | 9                     |
| Denmark                                                                                | 1                    | 0                     |
| Belgium                                                                                | 1                    | 0                     |
| Australia                                                                              | 1                    | 10                    |
| United States                                                                          | 0                    | 4                     |
| Scotland                                                                               | 0                    | 2                     |
| Not reported/Unclear                                                                   | 0                    | 1                     |
| <i>Reported funding, n (%)</i>                                                         | 39 (75)              | 28 (55)               |
| Funding source, n                                                                      |                      |                       |
| External, peer reviewed grant                                                          | 6                    | 2                     |
| External, non-commercial (fee for service)                                             | 22                   | 25                    |
| External, commercial (fee for service)                                                 | 2                    | 0                     |
| Internal                                                                               | 0                    | 1                     |
| Specified no funding received                                                          | 9                    | 0                     |
| <i>Type of publishing journal, n (%)</i>                                               |                      |                       |
| General                                                                                | 15 (29)              | n/a                   |
| Specialty                                                                              | 37 (71)              | n/a                   |
| <i>RRs Publicly available, n (%)</i>                                                   | 36 (69)              | 50 (98)               |
| <i>Unique journals, n</i>                                                              | 47                   | n/a                   |
| <i>Peer reviewed, n (%)</i>                                                            | 50 (96) <sup>3</sup> | 6 (12) <sup>4</sup>   |
| <i>Language of the RRs, n (%)</i>                                                      |                      |                       |
| English                                                                                | 52 (100)             | 50 (98)               |
| French                                                                                 | 0                    | 1(2)                  |

SD – standard deviation; n/a – not applicable

<sup>1</sup> Per country

<sup>2</sup> First, second, corresponding, or senior author

<sup>3</sup> Peer review confirmed if journal listed on the DOAJ or if specifically stated as a policy of the journal

<sup>4</sup> NJP peer review status based on reporting of methods or from available methods guidance from respective institutions

**S7 Table 2. General Content of the Identified Rapid Reviews (RRs)**

| Content                                                                | Journal<br>(n=52) | Non-journal<br>(n=51) |
|------------------------------------------------------------------------|-------------------|-----------------------|
| <i>Purpose or rationale for RR clearly stated by the authors</i>       | 33 (63)           | 30 (59)               |
| <i>Number of RRs that did <u>not</u> report time to conduct, n (%)</i> | 49 (94)           | 48 (94)               |
| <i>Time to conduct the RR reported, n (%)</i>                          | 3 (6)             | 3 (6)                 |
| 4 weeks                                                                | 0                 | 2                     |
| 8 weeks                                                                | 1                 | 0                     |
| 17 weeks                                                               | 0                 | 1                     |
| 24 weeks                                                               | 1                 | 0                     |
| 32 weeks                                                               | 1                 | 0                     |
| <i>Key questions, n (%)</i>                                            |                   |                       |
| 1                                                                      | 37 (71)           | 31 (61)               |
| 2                                                                      | 7 (13)            | 8 (16)                |
| 3                                                                      | 3 (6)             | 8 (16)                |
| ≥4                                                                     | 5 (10)            | 4 (8)                 |
| <i>Number of included studies in the RRs, median (IQR) [range]</i>     | 55 (30) [2-1820]  | 9 (23) [1-147]        |
| <i>Number of study designs included in the RRs, n (%)</i>              |                   |                       |
| One                                                                    | 14 (27)           | 23 (45)               |
| Two                                                                    | 12 (23)           | 10 (20)               |
| Three                                                                  | 19 (37)           | 14 (27)               |
| Four                                                                   | 4 (8)             | 3 (6)                 |
| Five                                                                   | 3 (6)             | 1 (2)                 |
| <i>RRs with only <u>one</u> study design, n</i>                        |                   |                       |
| RCTs                                                                   | 2                 | 9                     |
| Observational studies (cohorts, case-control, cross-sectional)         | 4                 | 6                     |
| Systematic Reviews                                                     | 3                 | 6                     |
| Other <sup>1</sup>                                                     | 1                 | 2                     |
| Unclear                                                                | 4                 | 0                     |
| <i>Frequency of included study designs, n</i>                          |                   |                       |
| Systematic reviews                                                     | 15                | 25                    |
| RCTs                                                                   | 17                | 24                    |
| Observations studies (cohorts, case-control, cross-sectional)          | 36                | 25                    |
| Other <sup>1</sup>                                                     | 21                | 16                    |
| Unclear                                                                | 28                | 12                    |
| <i>Main intervention, n (%)</i>                                        |                   |                       |
| Pharmacological                                                        | 4 (8)             | 13 (25)               |
| Non-pharmacological                                                    | 29 (56)           | 28 (55)               |
| Mixed                                                                  | 1 (2)             | 4 (8)                 |
| Other (does not address an intervention or exposure)                   | 18 (35)           | 6 (12)                |
| <i>Broad ICD-10 category<sup>2</sup></i>                               |                   |                       |
| 1 category addressed                                                   | 28 (54)           | 26 (51)               |
| >2 categories addressed                                                | 24 (46)           | 25 (49)               |
| <i>End-user consultations during development of the RR, n (%)</i>      | 18 (35)           | 29 (57)               |

*IQR – inter-quartile range*

<sup>1</sup> Other may include qualitative, quasi-experimental designs including interrupted time series, controlled before/after, case series etc.

<sup>2</sup> ICD-10 - International Classification of Diseases, Tenth Revision

**S7 Table 3. 2016 Rapid Reviews: Report Format, Layout, Content and Other Features**

|                                                      | Journal (N=52)  | Non-journal (N=51) | Odds Ratio (95% CI)          | P-value, F/W <sup>1</sup> |
|------------------------------------------------------|-----------------|--------------------|------------------------------|---------------------------|
| <b>Report identifying information</b>                |                 |                    |                              |                           |
| <i>Title or cover page, n (%)</i>                    | 2 (4)           | 35 (69)            | Not tested                   |                           |
| <i>Authorship reported, n (%)</i>                    | <b>52 (100)</b> | <b>37 (73)</b>     | OR not available             | < 0.0001, F               |
| In the byline under the title (as per most journals) | 43 (83)         | 3 (6)              |                              |                           |
| On the title or cover page                           | 2 (4)           | 5 (10)             |                              |                           |
| Listed at/near end of the main document              | 0               | 7 (14)             |                              |                           |
| Other                                                | 7 (13)          | 22 (42)            |                              |                           |
| <i>Publication date visible/reported, n (%)</i>      | 52 (100)        | 51 (100)           | Not tested                   |                           |
| Cited at the front end of the document               | 15 (29)         | 27 (53)            |                              |                           |
| Cited throughout the document                        | 32 (62)         | 24 (47)            |                              |                           |
| Partially visible/reported                           | 5 (10)          | 0                  |                              |                           |
| <b>Structure (document organization)</b>             |                 |                    |                              |                           |
| <i>Type of report structure, n (%)</i>               |                 |                    |                              |                           |
| Traditional IMRAD <sup>2</sup>                       | <b>48 (92)</b>  | 4 (8)              | <b>125.49 (28.75-792.06)</b> | < 0.0001, F               |
| Graded entry <sup>3</sup>                            | 0               | 24 (47)            |                              |                           |
| 1:3:25 <sup>4</sup>                                  | 0               | 1                  |                              |                           |
| SUPPORT Summary Style <sup>5</sup>                   | 0               | 4                  |                              |                           |
| Inverted Pyramid <sup>6</sup>                        | 0               | 3                  |                              |                           |
| Graded entry (other)                                 | 0               | 16                 |                              |                           |
| Graded entry front end followed by IMRAD             | 2 (4)           | 11 (22)            |                              |                           |
| Multicomponent report <sup>7</sup>                   | 2 (4)           | 12 (24)            |                              |                           |
| <i>Page numbering in the document, n (%)</i>         | 52 (100)        | 48 (94)            | Not tested                   |                           |
| <i>Page length, mean (SD)</i>                        |                 |                    | Not tested                   |                           |
| Full report (all pages)                              | 20.77 (33.56)   | 50.84 (51.18)      |                              |                           |
| Main report only <sup>8</sup>                        | 12.17 (10.40)   | 27.14 (25.22)      |                              |                           |
| Executive Summary                                    | 4.5 (2.1) (n=2) | 8.5 (10.25) (n=18) |                              |                           |
| <b>Content</b>                                       |                 |                    |                              |                           |
| <i>Banner and headers, n (%)<sup>9</sup></i>         |                 |                    |                              |                           |
| Abstract                                             | <b>47 (90)</b>  | 12 (24)            | <b>29.10 (9.01-115.99)</b>   | < 0.0001, F               |
| Executive Summary                                    | 2 (4)           | <b>11 (22)</b>     | <b>0.15 (0.02-0.74)</b>      | 0.01, F                   |
| Introduction/background                              | 43 (83)         | 36 (71)            | 1.98 (0.72-5.78)             | 0.17, F                   |
| Methods                                              | <b>51 (98)</b>  | 42 (82)            | <b>10.73 (1.39- 487.01)</b>  | 0.01, F                   |
| Results                                              | 48 (92)         | 46 (90)            | 1.30 (0.26-6.98)             | 0.74, F                   |
| Discussion                                           | <b>45 (87)</b>  | 6 (12)             | <b>45.14 (13.39-184.65)</b>  | < 0.0001, F               |
| Conclusions                                          | <b>45 (87)</b>  | 18 (35)            | <b>11.45 (4.07-36.59)</b>    | < 0.0001, F               |
| Key Messages                                         | 3 (6)           | <b>24 (47)</b>     | <b>0.07 (0.01-0.26)</b>      | < 0.0001, F               |
| Disclaimer                                           | 3 (6)           | <b>26 (51)</b>     | <b>0.06 (0.01-0.22)</b>      | < 0.0001, F               |

|                                                         | Journal (N=52)  | Non-journal (N=51)      | Odds Ratio (95% CI)            | P-value, F/W <sup>1</sup> |
|---------------------------------------------------------|-----------------|-------------------------|--------------------------------|---------------------------|
| Policy options/implications                             | 1 (2)           | <b>20 (39)</b>          | <b>0.03 (0.00-0.21)</b>        | < 0.0001, F               |
| Cost implications                                       | 3 (6)           | <b>23 (45)</b>          | <b>0.08 (0.01-0.27)</b>        | < 0.0001, F               |
| Limitations                                             | 24 (46)         | 18 (35)                 | 1.56 (0.66-3.75)               | 0.32, F                   |
| Recommendations for future research                     | 6 (12)          | 3 (6)                   | 2.07 (0.41-13.56)              | 0.49, F                   |
| References                                              | 50 (96)         | 51 (100)                | 0.00 (0.00-5.41)               | 0.50, F                   |
| Appendices                                              | 20 (38)         | <b>35 (69)</b>          | <b>0.29 (0.12-0.69)</b>        | 0.01, F                   |
| Acknowledgement                                         | <b>26 (50)</b>  | 13 (25)                 | <b>2.89 (1.18-7.36)</b>        | 0.01, F                   |
| Conflict of Interests                                   | <b>37 (71)</b>  | 10 (20)                 | <b>9.84 (3.73-28.21)</b>       | < 0.0001, F               |
| Author contributions                                    | <b>20 (38)</b>  | 2 (4)                   | <b>14.95 (3.28-140.57)</b>     | < 0.0001, F               |
| Abbreviations                                           | 8 (15)          | 10 (20)                 | 0.75 (0.23-2.34)               | 0.61, F                   |
| <i>Implications (not otherwise specified)</i>           | 5 (10)          | 3 (6)                   | Not tested                     |                           |
| <i>Quality of the body of evidence</i>                  | 1 (2)           | 3 (6)                   | Not tested                     |                           |
| <i>Equity</i>                                           | 0               | 2 (4)                   | Not tested                     |                           |
| <i>Local applicability of results</i>                   | 0               | 5 (10)                  | Not tested                     |                           |
| <i>Implementation considerations</i>                    | 0               | 3 (6)                   | Not tested                     |                           |
| <i>Various (miscellaneous – other)</i>                  | 50 (96)         | 50 (98)                 | Not tested                     |                           |
| <b>Visual design</b>                                    |                 |                         |                                |                           |
| <b>Legibility</b>                                       |                 |                         |                                |                           |
| <i>Document preparation system, n (%)</i>               |                 |                         |                                |                           |
| High quality typesetting system                         | 48 (92)         | 12 (24)                 | Not tested                     |                           |
| Word processing system/desktop publishing software      | 4 (8)           | 39 (76)                 |                                |                           |
| <i>General typeface of the main text, n (%)</i>         |                 |                         |                                |                           |
| Serif <sup>10</sup>                                     | <b>44 (85)</b>  | 13 (25)                 | <b>15.51 (5.51-48.98)</b>      | < 0.0001, F               |
| Sans-serif <sup>11</sup>                                | 8 (15)          | 38 (75)                 |                                |                           |
| <i>General typeface of the main text headers, n (%)</i> |                 |                         |                                |                           |
| Serif <sup>10</sup>                                     | <b>36 (69)</b>  | 4 (8)                   | <b>OR: 25.89 (7.68-116.13)</b> | < 0.0001, F               |
| Sans-serif <sup>11</sup>                                | 12 (23)         | <b>44 (86)</b>          | <b>OR: 0.05 (0.02-0.15)</b>    | < 0.0001, F               |
| Both                                                    | 4 (8)           | 3 (6)                   | OR: 1.33 (0.21-9.56)           | 1.00, F                   |
| <i>General typeface of the abstract text, n (%)</i>     |                 |                         |                                |                           |
| Serif <sup>10</sup>                                     | N=52<br>19 (37) | N=12<br><b>12 (100)</b> | Not tested                     |                           |
| Sans-serif <sup>11</sup>                                | 33 (63)         | 0                       |                                |                           |
| <i>General typeface of the abstract headers, n (%)</i>  |                 |                         |                                |                           |
| Serif <sup>10</sup>                                     | 11 (21)         | 9 (75)                  | Not tested                     |                           |
| Sans-serif <sup>11</sup>                                | 38 (73)         | 3 (25)                  |                                |                           |
| No header in abstract                                   | 3 (6)           | 0                       |                                |                           |
| <i>Line spacing of the main document, n (%)</i>         |                 |                         |                                |                           |
| Single spaced                                           | n/a             | 35 (69)                 | Not tested                     |                           |

|                                                          | Journal (N=52) | Non-journal (N=51) | Odds Ratio (95% CI)     | P-value, F/W <sup>1</sup> |
|----------------------------------------------------------|----------------|--------------------|-------------------------|---------------------------|
| >Single spaced                                           | n/a            | 16 (31)            |                         |                           |
| <i>Main document is presented in columns, n (%)</i>      |                |                    |                         |                           |
| Single column                                            | 11 (21)        | 45 (88)            |                         | Not tested                |
| Double column                                            | 39 (75)        | 3 (6)              |                         |                           |
| Triple column                                            | 2 (4)          | 0                  |                         |                           |
| Other                                                    | 0              | 3 (6)              |                         |                           |
| <b>Graphic elements</b>                                  |                |                    |                         |                           |
| <i>Use of typographic cues in the document, n (%)</i>    |                |                    |                         |                           |
| Bolded headers                                           | 52 (100)       | 51 (100)           | OR not available        | 1.00, F                   |
| Bolded text, keywords or phrases                         | 5 (10)         | <b>17 (33)</b>     | <b>0.22 (0.06-0.69)</b> | 0.01, F                   |
| Use of colour text, keywords or phrases                  | 12 (23)        | 16 (31)            | 0.66 (0.25-1.72)        | 0.38, F                   |
| User of underlining text, keywords or phrases            | 1 (2)          | <b>29 (57)</b>     | <b>0.02 (0.00-0.11)</b> | < 0.0001, F               |
| Bullet lists                                             | 25 (48)        | <b>44 (86)</b>     | <b>0.15 (0.05-0.42)</b> | < 0.0001, F               |
| Call out boxes                                           | 20 (38)        | 17 (33)            | 1.25 (0.52-3.04)        | 0.68, F                   |
| User of italics to highlight text, keywords or phrases   | 40 (77)        | 38 (75)            | 1.14 (0.42-3.11)        | 0.82, F                   |
| <i>Main document text, n (%)</i>                         |                |                    |                         |                           |
| Monochrome (black and white, or grey scale)              | 39 (75)        | 36 (71)            | Monochrome/Colour       | 0.66, F                   |
| Colour                                                   | 13 (25)        | 15 (29)            | 1.25 (0.48-3.28)        |                           |
| <i>Background colour</i>                                 |                |                    |                         |                           |
| white                                                    | 13             | 15                 |                         |                           |
| <i>Text</i>                                              |                |                    |                         |                           |
| black                                                    | 13             | 13                 |                         |                           |
| dark blue                                                | 0              | 2                  |                         |                           |
| <i>Accent colour</i>                                     |                |                    |                         |                           |
| blue                                                     | 7              | 8                  |                         |                           |
| green                                                    | 4              | 1                  |                         |                           |
| teal                                                     | 0              | 1                  |                         |                           |
| purple                                                   | 2              | 1                  |                         |                           |
| mix                                                      | 0              | 4                  |                         |                           |
| <i>Tables were presented in the main document, n (%)</i> |                |                    |                         |                           |
| Median, (IQR), [Range]                                   | 45 (87)        | 45 (88)            | 0.86 (0.22-3.25)        | 1.00, F                   |
|                                                          | 2 (3) [1-17]   | 6 (8.75) [1-33]    |                         |                           |
| <i>Type of tables presented, n</i>                       |                |                    |                         |                           |
| Characteristics of included studies                      | 13             | 20                 | 0.52 (0.20-1.30)        | 0.14, F                   |
| Outcome-specific data tables                             | 6              | <b>18</b>          | <b>0.24 (0.07-0.72)</b> | 0.01, F                   |
| Evidence tables (i.e., study level data tables)          | 18             | 20                 | 0.82 (0.34-1.97)        | 0.69, F                   |
| General summary of findings tables                       | 12             | 12                 | 0.98 (0.35-2.70)        | 1.00, F                   |
| GRADE Summary of Findings tables                         | 1              | 1                  | 0.98 (0.01-78.43)       | 1.00, F                   |
| Quality assessment tables                                | 5              | 4                  | 1.20 (0.24-6.42)        | 1.00, F                   |
| Other (various e.g., non-study level for introduction)   | 29             | 56                 | Not tested              |                           |
| <i>Material provided in appendices, n (%)</i>            |                |                    |                         |                           |
|                                                          | 27 (52)        | <b>37 (73)</b>     | <b>0.41 (0.17-1.00)</b> | 0.04, F                   |

|                                                                                                                      | Journal (N=52) | Non-journal (N=51) | Odds Ratio (95% CI)         | P-value, F/W <sup>1</sup> |
|----------------------------------------------------------------------------------------------------------------------|----------------|--------------------|-----------------------------|---------------------------|
| <i>Content of appendices:</i>                                                                                        |                |                    |                             |                           |
| Search strategies/terms/sources searched                                                                             | 20             | 22                 |                             |                           |
| Methods                                                                                                              | 1              | 4                  |                             |                           |
| Inclusion criteria                                                                                                   | 2              | 1                  |                             |                           |
| Data extraction forms                                                                                                | 3              | 1                  |                             |                           |
| List of included studies                                                                                             | 1              | 1                  |                             |                           |
| List of excluded studies                                                                                             | 2              | 5                  |                             |                           |
| Evidence tables (i.e., study level data)                                                                             | 10             | 19                 |                             |                           |
| Table of study characteristics                                                                                       | 5              | 11                 |                             |                           |
| Outcome-specific data tables                                                                                         | 0              | 3                  |                             |                           |
| Quality assessment tool/evaluations                                                                                  | 9              | 13                 |                             |                           |
| GRADE Summary of Findings                                                                                            | 4              | 2                  |                             |                           |
| PRISMA Checklist                                                                                                     | 4              | 2                  |                             |                           |
| Protocol                                                                                                             | 2              | 0                  |                             |                           |
| Other (various material)                                                                                             | 7              | 21                 |                             |                           |
| Appendices not freely accessible (not able to assess)                                                                | 1              | 0                  |                             |                           |
| <i>Figures were presented in the main document, n (%)</i>                                                            | <b>38 (73)</b> | 25 (49)            | <b>2.79 (1.15-7.01)</b>     | 0.02, F                   |
| Median, (IQR), [Range]                                                                                               | 1 (1) [1-8]    | 2 (3) [1-11]       |                             |                           |
| <i>Types of figures presented, n</i>                                                                                 |                |                    |                             |                           |
| PRISMA flow diagram                                                                                                  | <b>34</b>      | 12                 | <b>6.02 (2.40-16.03)</b>    | < 0.0001, F               |
| Forest plot                                                                                                          | 1              | 1                  | 0.98 (0.01-78.43)           | 1.00, F                   |
| Other (drawing or schematic etc.)                                                                                    | 15             | 22                 | 0.54 (0.22-1.30)            | 0.15, F                   |
| Funnel plot                                                                                                          | 0              | 0                  |                             |                           |
| <i>Figures included in appendices, n (%)</i>                                                                         | 2 (4)          | <b>21 (41)</b>     | <b>0.06 (0.01-0.27)</b>     | < 0.0001, F               |
| <i>Types of figures presented, n</i>                                                                                 |                |                    |                             |                           |
| PRISMA flow diagram                                                                                                  | 0              | 15                 |                             |                           |
| Forest plot                                                                                                          | 1              | 0                  |                             |                           |
| Funnel plot                                                                                                          | 0              | 0                  |                             |                           |
| Other (drawing etc.)                                                                                                 | 1              | 6                  |                             |                           |
| Appendices not freely accessible (not able to assess)                                                                | 1              | 0                  |                             |                           |
| n/a (no figures included)                                                                                            | 49             | 33                 |                             |                           |
| <i>Visual cues or institutional taglines used to brand the organization commissioning or producing the RR, n (%)</i> |                |                    |                             |                           |
|                                                                                                                      |                |                    | Not tested                  |                           |
| Institutional logos                                                                                                  | 4 (8)          | 52 (100)           |                             |                           |
| Header text or footer text                                                                                           | 4 (8)          | 33 (65)            |                             |                           |
| Other (e.g., institutional symbol but not a specific logo)                                                           | 2 (4)          | 0                  |                             |                           |
| <b>Other factors related to layout</b>                                                                               |                |                    |                             |                           |
| <i>Placement of the methods section</i>                                                                              |                |                    |                             |                           |
| Front end of the document (e.g., for most journal publications)                                                      | <b>51 (98)</b> | 21 (50)            | <b>48.94 (7.01-2123.17)</b> | < 0.0001                  |
| Back end                                                                                                             | 0              | 4                  |                             |                           |

|                                                                                                   | Journal (N=52)  | Non-journal (N=51)     | Odds Ratio (95% CI)            | P-value, F/W <sup>1</sup> |
|---------------------------------------------------------------------------------------------------|-----------------|------------------------|--------------------------------|---------------------------|
| Other                                                                                             |                 |                        |                                |                           |
| In the general text; no specific section                                                          | 1 (2)           | 0                      |                                |                           |
| Methods information in the appendices                                                             | 0               | 17 (40)                |                                |                           |
| <i>Placement of the 'key messages'</i>                                                            | <i>n=3</i>      | <i>n=24</i>            |                                |                           |
| Front end of the document                                                                         | 2               | 22                     | Not tested                     |                           |
| Back end of the document                                                                          | 1               | 2                      |                                |                           |
| Other                                                                                             | 0               | 0                      |                                |                           |
| <i>Placement of 'disclaimer'</i>                                                                  | <i>n=3</i>      | <i>n=26</i>            |                                |                           |
| Front end of the document                                                                         | 2               | 25                     | Not tested                     |                           |
| Back end of the document                                                                          | 1               | 0                      |                                |                           |
| Other                                                                                             | 0               | 1                      |                                |                           |
| <i>Determination of the final report format, n (%)</i>                                            |                 |                        | Not tested                     |                           |
| Producer                                                                                          | n/a             | 1 (2)                  |                                |                           |
| Commissioner                                                                                      | n/a             | 2 (4)                  |                                |                           |
| Not reported/unclear                                                                              | n/a             | 48 (94)                |                                |                           |
| Journal                                                                                           | 52              | n/a                    |                                |                           |
| <i>Stakeholder input with regards to the format and/or layout of the final end-product, n (%)</i> |                 |                        | Not tested                     |                           |
| Yes                                                                                               | n/a             | 0                      |                                |                           |
| No/Not Reported                                                                                   | n/a             | 51 (100)               |                                |                           |
| <i>Additional materials listed as available upon request, n (%)</i>                               | 2 (4)           | 3 (6)                  | OR: 0.64 (0.05-5.87)           | 0.68, F                   |
| <b>Readability</b>                                                                                |                 |                        |                                |                           |
| <i>SMOG Index, mean (SD)</i>                                                                      |                 |                        |                                |                           |
| Abstract/Summary                                                                                  | 13.91 (1.55)    | 14.24 (1.36)           | MD (SE): -0.33 (0.29)          | 0.25, W                   |
| Introduction/Background                                                                           | 14.01 (1.91)    | 13.57 (1.55)           | MD (SE): 0.44 (0.34)           | 0.20, W                   |
| Discussions/Conclusion                                                                            | 13.79 (1.68)    | 14.35 (2.29)           | MD (SE): -0.56 (0.40)          | 0.16, W                   |
| <i>Word count (cursory-level), mean (SD)<sup>12</sup> (entire document)</i>                       | 10,343 (10,051) | <b>17,393 (15,385)</b> | <b>MD (SE): -7,050 (2,566)</b> | <b>0.01, W</b>            |
| <i>Word count (cursory-level), mean (SD)<sup>12</sup> (main body of the text only)</i>            | 6,708 (4,575)   | <b>10,269 (8,818)</b>  | <b>MD (SE): -3,561 (1,388)</b> | <b>0.01, W</b>            |

SD: standard deviation; MD: mean difference; SE: standard error; n/a: not applicable

<sup>1</sup> F: Fisher's Exact Test for binomial counts; W: Welch's t-test for continuous score

<sup>2</sup> IMRAD: a report format structured to include the following sections consecutively: Introduction, Methods, Results and Discussion sections of an original article

<sup>3</sup> Graded entry: a report format organized to highlight decision-relevant, summarized information upfront with access to additional, more in-depth information.

<sup>4</sup> 1:3:25 format – a structure comprised of 1-page of main messages; 3-page executive summary; with an additional 25-pages allotted for the full report including references and appendices

<sup>5</sup> SUPPORT Summary format – a structured designed to present the results of SRs to decision-makers with key messages from findings upfront, followed by context; search approach; search results; details of main findings including methodological quality of the evidence; applicability, equity, economic, monitoring and evaluation considerations; and references

<sup>6</sup> Inverted pyramid format – a structure that emphasizes the conclusions or key messages upfront followed by brief (executive) summary, followed by a lengthier report that provides specific details for the reader. For the purposes of this study, this format similarly follows a 1:3:25 format but does not strictly adhere to this page count

<sup>7</sup> Multicomponent – refers to a report with various components divided into 'chapters' or 'sections' beyond the typical IMRAD or general graded entry structures

<sup>8</sup> Excluding references and appendices

<sup>9</sup> 'Bannered' only refers to specifically labelled sections; if not labelled, this does not necessarily imply that the section or related content of a section was missing from the report(s); of the labels identified, some potentially overlap and could refer to similar concepts. However, content of the bannered sections was not formally assessed in this study.

<sup>10</sup> Serif font – category of typefaces that use small lines at the ends of characters (e.g., Times Roman, Courier)

<sup>11</sup> San-serif – category of typefaces that do not use small lines at the ends of characters (e.g., Arial, Calibri)

<sup>12</sup> Word count was calculated by converting PDF versions of the reports to Microsoft Word, and then using Word Count function
