# Supplementary material for: Assessing the format and content of journal published and non-journal published rapid review reports: A comparative study
Source: PubMed Central journal article supplement (PMC7449464; doi:10.1371/journal.pone.0238025), 2020-08-26
Supplement: pone.0238025.s010.pdf [file pone.0238025.s010.pdf]

**S8 Table. Peer Review Status and Salient Characteristics of Potential Predatory Journals**

| Unique Journals (n=47)                              | Publisher                                   | Publication model | Peer Review | Salient characteristics of potential predatory journals     |                           |                                                     |                                   |                         |                                        |                  |                   |                      |                                                 |                         |                                               |                        |   |
|-----------------------------------------------------|---------------------------------------------|-------------------|-------------|-------------------------------------------------------------|---------------------------|-----------------------------------------------------|-----------------------------------|-------------------------|----------------------------------------|------------------|-------------------|----------------------|-------------------------------------------------|-------------------------|-----------------------------------------------|------------------------|---|
|                                                     |                                             |                   |             | Scope Includes non-biomedical subjects alongside biomedical | Website spelling, grammar | Images: distorted/ fuzzy; deceiving or unauthorized | Homepage language targets authors | ICV promoted on website | Manuscript process description lacking | Email submission | Rapid publication | No retraction policy | No information, digital preservation of content | Very low article charge | Open access, retain or fail to note copyright | Email not professional |   |
| Appetite                                            | Elsevier                                    | Hyb               | Y           | *                                                           | *                         | *                                                   | *                                 | *                       | *                                      | *                | *                 | *                    | *                                               | *                       | *                                             | *                      | * |
| Arch Dis Child                                      | BMJ Publishing Group                        | Hyb               | Y           | *                                                           | *                         | *                                                   | *                                 | *                       | *                                      | *                | *                 | *                    | *                                               | *                       | *                                             | *                      | * |
| Australian & New Zealand Journal of Psychiatry      | SAGE                                        | Hyb               | Y           | *                                                           | *                         | *                                                   | *                                 | *                       | *                                      | *                | *                 | *                    | *                                               | *                       | *                                             | *                      | * |
| Australian Journal of Primary Health                | CISRO Publishing                            | Hyb               | Y           | *                                                           | *                         | *                                                   | *                                 | *                       | *                                      | *                | *                 | *                    | *                                               | *                       | *                                             | *                      | * |
| BMC Health Services Research                        | BMC                                         | OA                | Y           | <i>Listed in the DOAJ</i>                                   |                           |                                                     |                                   |                         |                                        |                  |                   |                      |                                                 |                         |                                               |                        |   |
| BMJ Open                                            | BMJ Publishing Group                        | OA                | Y           | <i>Listed in the DOAJ</i>                                   |                           |                                                     |                                   |                         |                                        |                  |                   |                      |                                                 |                         |                                               |                        |   |
| Canadian Journal of Gastroenterology and Hepatology | Hindawi Publishing Corp.                    | OA                | Y           | <i>Listed in the DOAJ</i>                                   |                           |                                                     |                                   |                         |                                        |                  |                   |                      |                                                 |                         |                                               |                        |   |
| Canadian Journal of Occupational Therapy            | SAGE                                        | Hyb               | Y           | *                                                           | *                         | *                                                   | *                                 | *                       | *                                      | *                | *                 | *                    | *                                               | *                       | *                                             | *                      | * |
| Canadian Respiratory Journal                        | Hindawi Publishing Corp.                    | OA                | Y           | <i>Listed in the DOAJ</i>                                   |                           |                                                     |                                   |                         |                                        |                  |                   |                      |                                                 |                         |                                               |                        |   |
| Caries Res                                          | Karger Publishers                           | Hyb               | Y           | *                                                           | *                         | *                                                   | *                                 | *                       | *                                      | *                | *                 | *                    | ✓                                               | *                       | *                                             | *                      | * |
| Child Abuse & Neglect                               | Elsevier                                    | Hyb               | Y           | *                                                           | *                         | *                                                   | *                                 | *                       | *                                      | *                | *                 | *                    | *                                               | *                       | *                                             | *                      | * |
| Clinical Neurology and Neurosurgery                 | Elsevier                                    | Hyb               | Y           | *                                                           | *                         | *                                                   | *                                 | *                       | *                                      | *                | *                 | *                    | *                                               | *                       | *                                             | *                      | * |
| Emergency Medicine Journal                          | BMJ Group                                   | Hyb               | Y           | *                                                           | *                         | *                                                   | *                                 | *                       | *                                      | *                | *                 | *                    | *                                               | *                       | *                                             | *                      | * |
| Eur J Nucl Med Mol Imaging                          | Springer                                    | Hyb               | Y           | *                                                           | *                         | *                                                   | *                                 | *                       | *                                      | *                | *                 | *                    | *                                               | *                       | *                                             | *                      | * |
| European Journal of Cardiovascular Nursing          | SAGE                                        | Hyb               | Y           | *                                                           | *                         | *                                                   | *                                 | *                       | *                                      | *                | *                 | *                    | *                                               | *                       | *                                             | *                      | * |
| Gerontologist                                       | Oxford Academic                             | Hyb               | Y           | *                                                           | *                         | *                                                   | *                                 | *                       | *                                      | *                | *                 | *                    | *                                               | *                       | *                                             | *                      | * |
| Health Promotion International                      | Oxford Academic                             | Hyb               | Y           | *                                                           | *                         | *                                                   | *                                 | *                       | *                                      | *                | *                 | *                    | *                                               | *                       | *                                             | *                      | * |
| Health Services and Delivery Research               | National Institutes of Health Research (UK) | OA                | Y           | <i>Listed in the DOAJ</i>                                   |                           |                                                     |                                   |                         |                                        |                  |                   |                      |                                                 |                         |                                               |                        |   |
| Health Technology Assessment                        | National Institutes of Health Research (UK) | OA                | Y           | <i>Listed in the DOAJ</i>                                   |                           |                                                     |                                   |                         |                                        |                  |                   |                      |                                                 |                         |                                               |                        |   |
| Human Resources for Health                          | BMC (BioMed Central)                        | OA                | Y           | <i>Listed in the DOAJ</i>                                   |                           |                                                     |                                   |                         |                                        |                  |                   |                      |                                                 |                         |                                               |                        |   |
| Infectious Diseases of Poverty                      | BMC (BioMed Central)                        | OA                | Y           | <i>Listed in the DOAJ</i>                                   |                           |                                                     |                                   |                         |                                        |                  |                   |                      |                                                 |                         |                                               |                        |   |
| Int. J. Nurs. Educ. Scholarsh.                      | De Gruyter                                  | Hyb               | Y           | *                                                           | *                         | *                                                   | *                                 | *                       | *                                      | *                | *                 | *                    | ✓                                               | *                       | ✓                                             | *                      | * |

| Unique Journals (n=47)                      | Publisher                                                         | Publication model | Peer Review | Salient characteristics of potential predatory journals     |                           |                                                    |                                   |                         |                                        |                  |                   |                      |                                                 |                         |                                               |                        |
|---------------------------------------------|-------------------------------------------------------------------|-------------------|-------------|-------------------------------------------------------------|---------------------------|----------------------------------------------------|-----------------------------------|-------------------------|----------------------------------------|------------------|-------------------|----------------------|-------------------------------------------------|-------------------------|-----------------------------------------------|------------------------|
|                                             |                                                                   |                   |             | Scope includes non-biomedical subjects alongside biomedical | Website spelling, grammar | Images: distorted/fuzzy; deceiving or unauthorized | Homepage language targets authors | ICV promoted on website | Manuscript process description lacking | Email submission | Rapid publication | No retraction policy | No information, digital preservation of content | Very low article charge | Open access, retain or fail to note copyright | Email not professional |
| Int. J. Oral Maxillofac. Surg.              | Elsevier                                                          | Hyb               | Y           | x                                                           | x                         | x                                                  | x                                 | x                       | x                                      | x                | x                 | x                    | x                                               | x                       | x                                             | x                      |
| International Journal of Prisoner Health    | Emerald Insight                                                   | Hyb               | Y           | x                                                           | x                         | x                                                  | x                                 | x                       | x                                      | x                | x                 | x                    | x                                               | x                       | x                                             | x                      |
| Journal of Emergency Medicine               | Elsevier                                                          | Hyb               | Y           | x                                                           | x                         | x                                                  | x                                 | x                       | x                                      | x                | x                 | x                    | x                                               | x                       | x                                             | x                      |
| Journal of Head Trauma Rehabilitation       | Wolters Kluwer Health                                             | Hyb               | Y           | x                                                           | x                         | x                                                  | x                                 | x                       | x                                      | x                | x                 | ✓                    | x                                               | x                       | x                                             | x                      |
| Journal of the American Dental Association  | Elsevier                                                          | Hyb               | Y           | x                                                           | x                         | x                                                  | x                                 | x                       | x                                      | x                | x                 | x                    | x                                               | x                       | x                                             | x                      |
| Journal of Advanced Nursing                 | Wiley                                                             | Hyb               | Y           | x                                                           | x                         | x                                                  | x                                 | x                       | x                                      | x                | x                 | x                    | x                                               | x                       | x                                             | x                      |
| Journal of Evidence-Based Medicine          | Wiley                                                             | Hyb               | Y           | x                                                           | x                         | x                                                  | x                                 | x                       | x                                      | x                | x                 | x                    | x                                               | x                       | x                                             | x                      |
| Journal of Medical Screening                | Sage                                                              | Hyb               | Y           | x                                                           | x                         | x                                                  | x                                 | x                       | x                                      | x                | x                 | x                    | x                                               | x                       | x                                             | x                      |
| Journal of Primary Care & Community Health  | Sage                                                              | OA                | Y           | <i>Listed in the DOAJ</i>                                   |                           |                                                    |                                   |                         |                                        |                  |                   |                      |                                                 |                         |                                               |                        |
| Journal of Public Health                    | Oxford Academic                                                   | Hyb               | Y           | x                                                           | x                         | x                                                  | x                                 | x                       | x                                      | x                | x                 | x                    | x                                               | x                       | x                                             | x                      |
| Journal of Research in Nursing              | Sage                                                              | Hyb               | Y           | x                                                           | x                         | x                                                  | x                                 | x                       | x                                      | x                | x                 | x                    | x                                               | x                       | x                                             | x                      |
| Journal of Wound Care                       | MA Healthcare Limited, part of the Mark Allen Group of companies, | Subscription      | Y           | x                                                           | x                         | x                                                  | x                                 | x                       | x                                      | x                | x                 | ✓                    | x                                               | x                       | x                                             | x                      |
| Nursing Ethics                              | SAGE                                                              | Hyb               | Y           | x                                                           | x                         | x                                                  | x                                 | x                       | x                                      | x                | x                 | x                    | x                                               | x                       | x                                             | x                      |
| Ontario Health Technology Assessment Series | Health Quality Ontario (HQO)                                      | OA                | N           | x                                                           | x                         | x                                                  | x                                 | x                       | NA                                     | NA               | NA                | ✓                    | ✓                                               | NA                      | NA                                            | x                      |
| Perspectives in Public Health               | SAGE                                                              | Hyb               | Y           | x                                                           | x                         | x                                                  | x                                 | x                       | x                                      | x                | x                 | x                    | x                                               | x                       | x                                             | x                      |
| PLOS Neglected Tropical Diseases            | PLOS                                                              | OA                | Y           | <i>Listed in the DOAJ</i>                                   |                           |                                                    |                                   |                         |                                        |                  |                   |                      |                                                 |                         |                                               |                        |
| PLoS ONE                                    | PLOS                                                              | OA                | Y           | <i>Listed in the DOAJ</i>                                   |                           |                                                    |                                   |                         |                                        |                  |                   |                      |                                                 |                         |                                               |                        |
| Public Health                               | Elsevier                                                          | Hyb               | Y           | x                                                           | x                         | x                                                  | x                                 | x                       | x                                      | x                | x                 | x                    | x                                               | x                       | x                                             | x                      |
| Rural and Remote Health                     | James Cook University                                             | OA                | Y           | x                                                           | x                         | x                                                  | x                                 | x                       | x                                      | x                | x                 | x                    | ✓                                               | x                       | x                                             | x                      |
| Systematic Reviews                          | BMC – BioMed Centre                                               | OA                | Y           | <i>Listed in the DOAJ</i>                                   |                           |                                                    |                                   |                         |                                        |                  |                   |                      |                                                 |                         |                                               |                        |
| Teaching and Learning in Medicine           | Taylor & Francis                                                  | Hyb               | Y           | x                                                           | x                         | x                                                  | x                                 | x                       | x                                      | x                | x                 | x                    | x                                               | x                       | x                                             | x                      |
| The Breast                                  | Elsevier                                                          | Hyb               | Y           | x                                                           | x                         | x                                                  | x                                 | x                       | x                                      | x                | x                 | x                    | x                                               | x                       | x                                             | x                      |
| The Lancet                                  | The Lancet                                                        | Hyb               | Y           | x                                                           | x                         | x                                                  | x                                 | x                       | x                                      | x                | x                 | x                    | x                                               | x                       | x                                             | x                      |
| Transpl Infect Dis                          | Wiley                                                             | Hyb               | Y           | x                                                           | x                         | x                                                  | x                                 | x                       | x                                      | x                | x                 | x                    | x                                               | x                       | x                                             | x                      |

| Unique Journals (n=47)                    | Publisher                                                                            | Publication model | Peer Review | Salient characteristics of potential predatory journals     |                           |                                                    |                                   |                         |                                        |                  |                   |                      |                                                 |                         |
|-------------------------------------------|--------------------------------------------------------------------------------------|-------------------|-------------|-------------------------------------------------------------|---------------------------|----------------------------------------------------|-----------------------------------|-------------------------|----------------------------------------|------------------|-------------------|----------------------|-------------------------------------------------|-------------------------|
|                                           |                                                                                      |                   |             | Scope includes non-biomedical subjects alongside biomedical | Website spelling, grammar | Images: distorted/fuzzy; deceiving or unauthorized | Homepage language targets authors | ICV promoted on website | Manuscript process description lacking | Email submission | Rapid publication | No retraction policy | No information, digital preservation of content | Very low article charge |
| Tropic Journal of Pharmaceutical Research | Pharmacotherapy Group, Faculty of Pharmacy, University of Benin, Benin City, Nigeria | OA                | Y           | Listed in the DOAJ                                          |                           |                                                    |                                   |                         |                                        |                  |                   |                      |                                                 |                         |

\* - salient characteristic not identified; ✓ - salient characteristic identified; DOAJ – Directory of Open Access Journals; Hyb – hybrid publishing model; IVC - The Index Copernicus Value; OA – open access; NA – not applicable
